# Supplementary material for: Glutamic Acid Enhances the Corrosion Inhibition of Polyaspartic Acid on Q235 Carbon Steel
Source: PubMed Central journal article supplement — ACS Omega. 2023 Oct 10;8(42):39709–19. doi: 10.1021/acsomega.3c05625 (PMC10601062; doi:10.1021/acsomega.3c05625), 2023-10-10
Supplement: ao3c05625_si_001.pdf [file ao3c05625_si_001.pdf]

# Supporting Information

## Glutamic acid enhances the corrosion inhibition of polyaspartic acid on Q235 carbon steel

Shichu Gong <sup>a, b</sup>, Yutong Li <sup>a, b</sup>, Hongyi Li <sup>a, b</sup>, Lin He <sup>a, c</sup>, Zhen Yan <sup>a, b</sup>, Shuguang Wang  
<sup>a, b, d, e</sup>, Xiaomin Sun <sup>f</sup>, Chao Song <sup>a, b</sup> \*

<sup>a</sup> Shandong Key Laboratory of Water Pollution Control and Resource Reuse, School of Environmental Science and Engineering, Shandong University, Qingdao, Shandong, 266237, China

<sup>b</sup> Shandong Key Laboratory of Environmental Processes and Health, School of Environmental Science and Engineering, Shandong University, Qingdao, Shandong, 266237, China

<sup>c</sup> China Railway fifth survey and design institute group CO., LTD., Beijing, 12600, China

<sup>d</sup> Sino-French Research Institute for Ecology and Environment (ISFREE), School of Environmental Science and Engineering, Shandong University, Qingdao, Shandong, 266237, China

<sup>e</sup> WeiHai Research Institute of Industrial Technology of Shandong University, Weihai, 264209, China

<sup>f</sup> Environment Research Institute, Shandong University, Qingdao 266237, China

---

\* Corresponding author. Tel.: +86 532 58630936; Fax: +86 532 58630907.  
E-mail address: songchao@sdu.edu.cn (Chao Song)

### **Text S1. Pre-treatment of coupons**

In the rotating hanging piece experiment of circulating cooling water, firstly, the specimens with a dimension of  $50 \times 25 \times 2 \text{ mm}^3$  were wiped the rust grease with filter papers, then plates were scrubbed in acetone and absolute ethanol respectively, and finally dried with filter paper and put in the dryer for 4 h. Test pieces ( $10 \times 10 \times 2 \text{ mm}^3$ ) used in the electrochemical experiment were polished with 600 and 800 mesh sandpapers on the grinder. Then, the specimens were degreased with acetone in an ultrasonic cleaner, washed with absolute ethanol, and dried in the air prior to testing.

### **Text S2. SEM and AFM analysis**

The coupons were first washed with the pickling solution (25% hydrochloric acid solution by volume), sodium hydroxide solution (60 g/L NaOH), and deionized water for 30 seconds in sequence, sucked their surface liquid, followed by dehydration using absolute ethanol for 3 minutes, sucked them dry with filter papers, and put in the dryer for more than 4 h. Finally, the coupons were dried in a supercritical  $\text{CO}_2$  dryer. The surface morphology of coupons was obtained from 10 images that were randomly captured for each sample

### **Text S3. Molecular dynamics simulation**

$Q$  is the constant phase element (CPE) and given by:

$$Q_{CPE} = \frac{1}{Y_0(j\omega)^n} \quad \text{eq(S1)}$$

Where  $Y_0$ ,  $\omega$ , and  $j$  are parameters related to the capacitive, angular frequency, and imaginary number, respectively.  $n$  is an exponential term related to the roughness of the electrolyte surface.

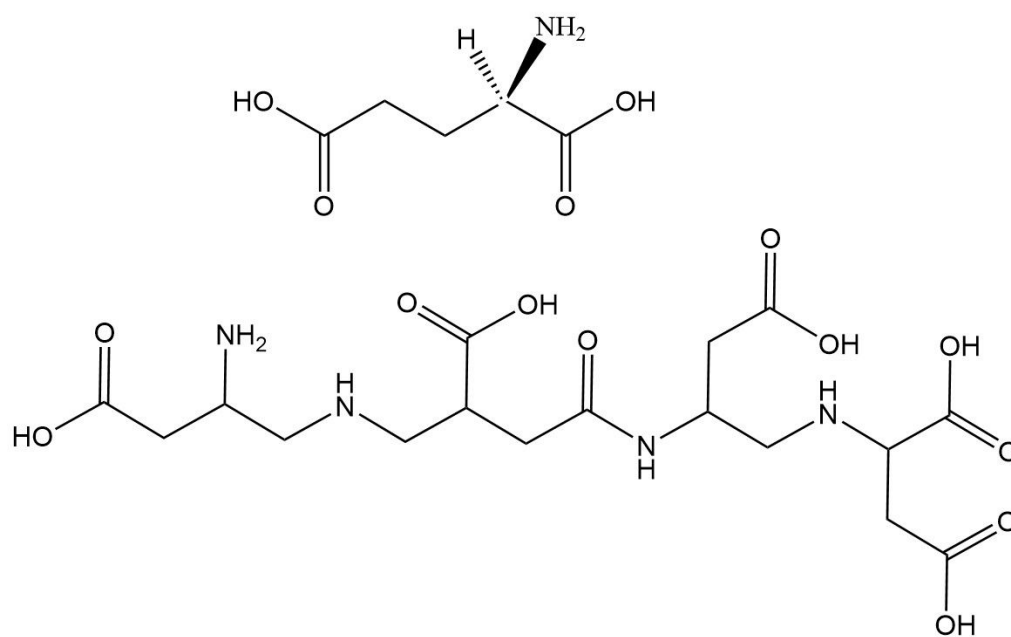

Figure S1. The two-dimensional structure of GLU and PASP.

**Table S1** Fitting parameters of EIS for Q235 carbon steel in four systems at different time.

| Group        | $Q_{dl}$ |                                         |                                            |                                                                                |      | $Q_f$                                   |                                                                                |      | $\chi^2$<br>( $10^{-4}$ ) |
|--------------|----------|-----------------------------------------|--------------------------------------------|--------------------------------------------------------------------------------|------|-----------------------------------------|--------------------------------------------------------------------------------|------|---------------------------|
|              | t<br>(d) | $R_s$<br>( $\Omega \cdot \text{cm}^2$ ) | $R_{ct}$<br>( $\Omega \cdot \text{cm}^2$ ) | $Y_0$<br>( $10^{-4} \cdot \text{S} \cdot \text{s}^{n1} \cdot \text{cm}^{-2}$ ) | n1   | $R_f$<br>( $\Omega \cdot \text{cm}^2$ ) | $Y_0$<br>( $10^{-4} \cdot \text{S} \cdot \text{s}^{n2} \cdot \text{cm}^{-2}$ ) | n2   |                           |
| Blank        | 0        | 155.2                                   | 1847                                       | 6.83                                                                           | 0.69 | 613.9                                   | 5.51                                                                           | 0.97 | 3.1                       |
|              | 1        | 153.5                                   | 2384                                       | 7.10                                                                           | 0.63 | 36.0                                    | 7.40                                                                           | 0.65 | 2.6                       |
|              | 2        | 158.5                                   | 1249                                       | 9.59                                                                           | 0.60 | 1310.0                                  | 4.28                                                                           | 0.69 | 3.9                       |
|              | 3        | 158.2                                   | 2095                                       | 2.53                                                                           | 0.77 | 247.8                                   | 46.13                                                                          | 0.86 | 2.7                       |
|              | 4        | 185.0                                   | 2491                                       | 2.62                                                                           | 0.76 | 952.4                                   | 8.99                                                                           | 0.80 | 3.7                       |
| GLU          | 5        | 165.1                                   | 1951                                       | 2.29                                                                           | 0.80 | 167.2                                   | 8.16                                                                           | 0.80 | 4.2                       |
|              | 0        | 170.7                                   | 1483                                       | 3.02                                                                           | 0.69 | 72.4                                    | 9.61                                                                           | 0.65 | 5.2                       |
|              | 1        | 174.4                                   | 1110                                       | 4.87                                                                           | 0.77 | 1224.0                                  | 1.33                                                                           | 0.61 | 3.1                       |
|              | 2        | 173.0                                   | 4215                                       | 2.25                                                                           | 0.77 | 2575.0                                  | 6.35                                                                           | 0.77 | 3.4                       |
|              | 3        | 166.3                                   | 3091                                       | 2.50                                                                           | 0.76 | 413.3                                   | 3.90                                                                           | 0.76 | 2.7                       |
| PASP         | 4        | 165.5                                   | 2834                                       | 2.56                                                                           | 0.77 | 182.6                                   | 2.26                                                                           | 0.83 | 5.8                       |
|              | 5        | 162.2                                   | 2757                                       | 1.73                                                                           | 0.91 | 39.8                                    | 0.78                                                                           | 0.91 | 6.3                       |
|              | 0        | 240.4                                   | 3413                                       | 5.11                                                                           | 0.74 | 140.4                                   | 4.42                                                                           | 0.69 | 5.7                       |
|              | 1        | 242.6                                   | 3336                                       | 5.64                                                                           | 0.70 | 1283.0                                  | 2.98                                                                           | 0.73 | 3.2                       |
|              | 2        | 227.6                                   | 6502                                       | 1.39                                                                           | 0.81 | 632.2                                   | 1.87                                                                           | 0.92 | 4.1                       |
| +GLU         | 3        | 217.0                                   | 4570                                       | 1.51                                                                           | 0.80 | 182.1                                   | 53.15                                                                          | 0.93 | 3.7                       |
|              | 4        | 215.7                                   | 5202                                       | 1.12                                                                           | 0.76 | 302.5                                   | 1.51                                                                           | 0.76 | 5.5                       |
|              | 5        | 226.3                                   | 3388                                       | 1.96                                                                           | 0.76 | 597.8                                   | 17.97                                                                          | 0.82 | 5.9                       |
|              | 0        | 260.8                                   | 1719                                       | 7.21                                                                           | 0.64 | 1457.0                                  | 3.68                                                                           | 0.62 | 4.1                       |
|              | 1        | 250.3                                   | 5914                                       | 1.43                                                                           | 0.81 | 659.6                                   | 3.07                                                                           | 0.93 | 3.4                       |
| PASP<br>+GLU | 2        | 237.3                                   | 11540                                      | 1.35                                                                           | 0.78 | 2530.0                                  | 1.45                                                                           | 0.90 | 2.1                       |
|              | 3        | 225.7                                   | 10870                                      | 0.13                                                                           | 0.87 | 330.2                                   | 1.21                                                                           | 0.75 | 9.2                       |
|              | 4        | 226.9                                   | 5812                                       | 5.29                                                                           | 0.93 | 248.4                                   | 1.42                                                                           | 0.79 | 5.4                       |
|              | 5        | 239.9                                   | 4156                                       | 0.17                                                                           | 0.91 | 246.2                                   | 1.31                                                                           | 0.76 | 4.1                       |

**Table S2** Electrochemical parameters of potentiodynamic polarization curve of Q235 steel in different groups

| Group    | Time (d) | Car Sip (1/V) | Ano Sip (1/V) | $I_{\text{corr}}$ ( $10^{-6}$ A) | CR(mil/year) | $P_{\text{corr}}$ (%) |
|----------|----------|---------------|---------------|----------------------------------|--------------|-----------------------|
| Blank    | 0        | 7.24          | 5.29          | 9.391                            | 4.31         |                       |
|          | 1        | 10.13         | 2.77          | 34.34                            | 11.17        |                       |
|          | 2        | 6.56          | 4.19          | 14.64                            | 6.72         |                       |
|          | 3        | 5.85          | 4.52          | 14.49                            | 6.65         |                       |
|          | 4        | 6.06          | 3.81          | 16.24                            | 7.46         |                       |
|          | 5        | 5.90          | 3.99          | 16.14                            | 7.41         |                       |
| GLU      | 0        | 11.61         | 2.88          | 16.91                            | 7.76         | -80.07                |
|          | 1        | 10.05         | 3.33          | 20.62                            | 9.47         | 39.95                 |
|          | 2        | 6.41          | 4.17          | 14.91                            | 6.84         | -1.84                 |
|          | 3        | 6.84          | 5.67          | 11.15                            | 5.12         | 23.05                 |
|          | 4        | 5.88          | 4.53          | 15.93                            | 7.31         | 1.91                  |
|          | 5        | 5.87          | 4.46          | 15.43                            | 7.08         | 4.40                  |
| PASP     | 0        | 6.17          | 5.30          | 7.05                             | 3.24         | 24.93                 |
|          | 1        | 9.83          | 3.98          | 8.096                            | 3.72         | 76.42                 |
|          | 2        | 10.26         | 5.10          | 6.467                            | 2.97         | 55.83                 |
|          | 3        | 9.68          | 3.93          | 9.147                            | 4.20         | 46.16                 |
|          | 4        | 9.62          | 4.26          | 9.401                            | 4.32         | 42.11                 |
|          | 5        | 6.39          | 3.84          | 18.04                            | 8.28         | -11.77                |
| PASP+GLU | 0        | 5.76          | 6.46          | 7.261                            | 3.33         | 22.68                 |
|          | 1        | 9.38          | 3.78          | 8.656                            | 3.97         | 74.79                 |
|          | 2        | 10.68         | 6.48          | 4.599                            | 2.11         | 68.59                 |
|          | 3        | 9.60          | 4.72          | 6.353                            | 2.92         | 62.61                 |
|          | 4        | 5.76          | 4.96          | 9.067                            | 4.16         | 44.17                 |
|          | 5        | 5.56          | 2.71          | 12.82                            | 5.88         | 20.57                 |
